# Supplementary material for: Total Worker Health® and Small Business Employee Perceptions of Health Climate, Safety Climate, and Well-Being during COVID-19
Source: MDPI journal article supplement (doi:10.3390/ijerph18189702), 2021-09-15
Supplement: s1 [file s1]

Table S1. Demographic data comparing organizations meeting study inclusion criteria compared to excluded organizations.

| <b>Business Characteristics, N=74.</b>     | <b>N (%) or Mean (SD)</b> | <b>Excluded Organizations (n=43)</b> | <b>Included Organizations (n=31)</b> | <b>p-value</b> |
|--------------------------------------------|---------------------------|--------------------------------------|--------------------------------------|----------------|
| Number of Employees, mean (SD)             | 83 (87)                   | 87 (77)                              | 77 (100)                             | 0.63           |
| Business size                              |                           |                                      |                                      | 0.50           |
| Micro (2-10 employees)                     | 11 (14.9%)                | 5 (11.6%)                            | 6 (19.4%)                            |                |
| Small (11-50 employees)                    | 31 (41.9%)                | 17 (39.5%)                           | 14 (45.2%)                           |                |
| Medium (51-200 employees)                  | 21 (28.4%)                | 15 (34.9%)                           | 6 (19.4%)                            |                |
| Large (200+ employees)                     | 11 (14.9%)                | 6 (14.0%)                            | 5 (16.1%)                            |                |
| Industry                                   |                           |                                      |                                      | 0.16           |
| Accommodation & Food Service               | 2 (2.7%)                  | 1 (2.3%)                             | 1 (3.2%)                             |                |
| Administration, Support & Waste Management | 1 (1.4%)                  | 1 (2.3%)                             | 0 (0.0%)                             |                |
| Agriculture, Forestry, Fishing, Hunting    | 2 (2.7%)                  | 2 (4.7%)                             | 0 (0.0%)                             |                |
| Arts, Entertainment & Recreation           | 3 (4.1%)                  | 1 (2.3%)                             | 2 (6.5%)                             |                |
| Construction                               | 6 (8.1%)                  | 4 (9.3%)                             | 2 (6.5%)                             |                |
| Educational Services                       | 7 (9.5%)                  | 3 (7.0%)                             | 4 (12.9%)                            |                |
| Healthcare and social assistance           | 15 (20.3%)                | 6(14.0%)                             | 9 (29.0%)                            |                |
| Information                                | 1 (1.4%)                  | 1 (2.3%)                             | 0 (0.0%)                             |                |
| Manufacturing                              | 5 (6.8%)                  | 5 (11.6%)                            | 0 (0.0%)                             |                |
| Non-profit                                 | 7 (9.5%)                  | 2 (4.7%)                             | 5 (16.1%)                            |                |
| Public Administration                      | 8 (10.8%)                 | 4 (9.3%)                             | 4 (12.9%)                            |                |
| Real Estate & Rental & Leasing             | 3 (4.1%)                  | 1 (2.3%)                             | 2 (6.5%)                             |                |
| Retail/Wholesale Trade                     | 1 (1.4%)                  | 1 (2.3%)                             | 0 (0.0%)                             |                |
| Services                                   | 9 (12.2%)                 | 8 (18.6%)                            | 1 (3.2%)                             |                |
| Transportation, Warehousing & Utilities    | 1 (1.4%)                  | 1 (2.3%)                             | 0 (0.0%)                             |                |
| Other                                      | 3 (4.1%)                  | 2 (4.7%)                             | 1 (3.2%)                             |                |
| Region                                     |                           |                                      |                                      | 0.46           |
| Urban                                      | 49 (66.2%)                | 27 (62.8%)                           | 22 (71.0%)                           |                |
| Rural                                      | 25 (33.8%)                | 16 (37.2%)                           | 9 (29.0%)                            |                |

**Table S2.** Distribution of completed surveys among 261 unique respondents.

| Baseline Health Culture Survey | COVID I Survey | COVID II Survey | Matched n=261 | Total Surveys n= 576 |
|--------------------------------|----------------|-----------------|---------------|----------------------|
|                                | X              | X               | 55            | 110                  |
| X                              |                | X               | 78            | 156                  |
| X                              | X              |                 | 74            | 148                  |
| X                              | X              | X               | 54            | 162                  |

**Table S3.** Comparison of mean health climate, safety climate and well-being scores for employees completing 2 surveys versus employees completing 3 surveys.

|                | Baseline Health and Safety Culture Survey |                     |         | COVID I Survey      |                     |         | COVID II Survey     |                     |         |
|----------------|-------------------------------------------|---------------------|---------|---------------------|---------------------|---------|---------------------|---------------------|---------|
|                | 2 Surveys Completed                       | 3 Surveys Completed | p-value | 2 Surveys Completed | 3 Surveys Completed | p-value | 2 Surveys Completed | 3 Surveys Completed | p-value |
| Health climate | 4.0 (0.81)                                | 4.2 (0.76)          | 0.37    | 4.1 (0.85)          | 4.1 (0.85)          | 0.94    | 4.1 (0.78)          | 4.0 (0.89)          | 0.61    |
| Safety climate | 3.8 (0.79)                                | 3.9 (0.71)          | 0.45    | 3.9 (0.83)          | 3.9 (0.80)          | 0.72    | 3.9 (0.84)          | 3.9 (0.85)          | 0.71    |
| Well-being     | 3.5 (0.69)                                | 3.6 (0.74)          | 0.31    | 3.1 (0.84)          | 3.1 (0.89)          | 0.92    | 3.3 (0.87)          | 3.3 (0.74)          | 0.57    |
